1  
2  
3  
4  
5  
6  
7  
8  
9  
10  
11  
12  
13  
14  
15  
16  
17  
18  
19  
20  
21  
22  
23  
24  
25

A comparison of the EQ-5D-5L and the SF-6Dv2 among patients with hypertrophic obstructive cardiomyopathy

**Short title:** EQ-5D-5L and the SF-6Dv2 in hypertrophic obstructive cardiomyopathy

Xiaoyu Wang<sup>1</sup>, Haiqiang Sang<sup>1\*</sup>, Rui Meng<sup>2</sup>, Xin Su<sup>1</sup>, Peng Liu<sup>1</sup>

<sup>1</sup>Department of Cardiovascular Medicine, The First Affiliated Hospital of Zhengzhou University, Zhengzhou University, Zhengzhou, Henan 450052, China

<sup>2</sup>School of International Pharmaceutical Business, China Pharmaceutical University, Nanjing, Jiangsu 210009, China

\*Corresponding author

Email: [fccsanghq@zzu.edu.cn](mailto:fccsanghq@zzu.edu.cn) (HS)

NOTE: This preprint reports new research that has not been certified by peer review and should not be used to guide clinical practice.

## 26 Abstract

27       **Background:** Hypertrophic obstructive cardiomyopathy (HOCM) is a serious and  
28 complex chronic disease severely affecting patients' daily lives and health-related quality of  
29 life (HRQoL). The psychometric performance of generic preference-based instruments has  
30 not been compared in Chinese patients with HOCM. We aimed to identify an applicable  
31 vehicle to determine HRQoL and explore the psychometric properties of SF-6Dv2 and EQ-  
32 5D-5L in adults with HOCM. The interchangeability of the tools in cost-utility analysis was  
33 also investigated. **Methods:** We collected data from 131 patients with HOCM from the First  
34 Affiliated Hospital of Zhengzhou University, China. Assessments were performed on the day  
35 of admission and three and six months after discharge using SF-6Dv2 and EQ-5D-5L. The  
36 responses were converted to utility values using the corresponding Chinese value sets. The  
37 tool distributions were explored, and the floor and ceiling effects were analyzed. The  
38 agreement was assessed using intra-class correlation coefficients (ICCs) and Bland–Altman  
39 plots. Convergent validity was tested using Spearman's rank correlation coefficient. Known  
40 group validity was measured across various clinical and sociodemographic indicators using  
41 relative efficiency (RE) statistics. **Results:** The mean utility scores for SF-6Dv2 and EQ-5D-  
42 5L at baseline and 6-month follow-up were 0.61, 0.62, 0.736, and 0.797, respectively. The  
43 EQ-5D-5L and SF-6Dv2 distribution scores showed no normality. EQ-5D-5L was more  
44 sensitive to changes over time and showed a moderate to good correlation with the SF-6Dv2  
45 (ICC: 0.598–0.862). The instruments' agreement and convergent validity worsened in  
46 patients with a higher New York Heart Association (NYHA) cardiac function classification  
47 and lower general health status. SF-6Dv2 showed higher relative efficiency statistics and a  
48 greater ability to distinguish external health status. **Conclusions:** The measured results can be  
49 used for future cost-utility analyses. SF-6Dv2 and EQ-5D-5L presented different results and

50 should not be used interchangeably. SF-6Dv2 is optimal for detecting differences between  
51 subgroups with various health states.

52

53 **Keywords:** SF-6Dv2, EQ-5D-5L, HOCM, Health-related quality of life

54

55

## 56 **Introduction**

57 Hypertrophic cardiomyopathy (HCM), distinguished by left ventricular myocardial  
58 hypertrophy, is a class of cardiac disorders caused by genetic factors. It often has an  
59 autosomal inheritance pattern due to variants in the genes encoding myosin (or myosin-  
60 associated genes) or may have an unknown genetic etiology [1]. The main feature of  
61 hypertrophic obstructive cardiomyopathy (HOCM) is a left ventricular outflow tract pressure  
62 difference of at least 30 mmHg at rest or with provocation. It accounts for approximately  
63 70% of all HCM patients [2]. Currently, the prevalence of HCM in China is 0.076%, and the  
64 mortality rate of HCM patients is as high as 3.38% [3]. HOCM is the main cause of sudden  
65 cardiac death in adolescents and athletes and is closely related to heart failure and stroke in  
66 older patients [4,5]. Typical symptoms include exertional dyspnea and weakness, chest pain,  
67 and palpitations, which tremendously impact patients' physical health and health-related  
68 quality of life (HRQoL) [6]. Parallel to this, HOCM is closely related to considerable  
69 expenditures on healthcare and imposes an enormous financial burden on global health  
70 budgets [7].

71 In order to provide evidence support for decision-makers to allocate limited resources  
72 among competing healthcare programs appropriately, cost-utility analysis (CUA) is  
73 incrementally being used. Quality-adjusted life years (QALYs) are health outcome indicators  
74 in CUA, which combines years of survival with utility values [8]. Utility scores are usually

75 expressed as a value from 0 to 1, where 1 represents perfect health and 0 represents death;  
76 they can also be negative, reflecting a disease situation worse than death. A series of  
77 universal health scales (multi-attribute utility instruments [MAUIs]) have been developed  
78 internationally to measure health utility values. Among the multitude of generic preference-  
79 based scales, the EuroQoL Five-Dimension (EQ-5D) from the European Society of Quality  
80 of Life [EuroQoL Group] along with the Short Form Six-Dimension (SF-6D) obtained based  
81 on the Short Form 36-item [SF-36] are among the most popular [9].

82 EQ-5D, developed by the EuroQol Group, is the most commonly used MAUIs  
83 worldwide. Compared to the original version of EQ-5D-3L, which contains only three  
84 response levels for each dimension, EQ-5D-5L offers five levels per dimension and lower  
85 ceiling effects when conducting a survey among the population [10]. The SF-6D scale is  
86 second only to the EQ-5D. Moreover, because the SF-6D scale dimension level setting is  
87 more abundant and sensitive, it is more suitable for chronic diseases where the clinical  
88 symptoms are not obvious. Compared with SF-6D, SF-6Dv2 has a much broader scoring  
89 range and addresses the problem of descriptive systems [11]. Differences in the structure and  
90 valuation of different instruments may give rise to various estimates of the identical “health  
91 state” for the same individual, which results in discrepancies in utility and healthcare-related  
92 decision-making. Therefore, it is crucial to measure the utility of HOcm patients using these  
93 two well-known instruments and to compare the psychometric properties of measurements  
94 and interchangeability.

95 Comparisons of the properties of SF-6D and EQ-5D measurements have already been  
96 validated for several diseases, including depressive symptoms and fibromyalgia [12,13].  
97 However, no studies have compared health utility values based on Chinese HOcm patients  
98 using EQ-5D-5L and SF-6Dv2. Therefore, we aimed to estimate the utility of Chinese  
99 patients with HOcm using EQ-5D-5L and SF-6Dv2. Furthermore, we evaluated whether

100 EQ-5D-5L and SF-6Dv2 revealed similar empirical estimates of health-related utility and  
101 interchangeability in patients with HOVM.

102

## 103 **Material and methods**

### 104 **EQ-5D-5L**

105 The EQ-5D-5L consists of two parts: a questionnaire section and the EuroQoL-visual  
106 analog scale (EQ-VAS). The questionnaire contained five dimensions, each with five severity  
107 levels: no problem, mild, moderate, severe, and very severe [14]. Thus, 3125 ( $5 \times 5 \times 5 \times 5 \times$   
108  $5 \times 5$ ) different health states described by the EQ-5D-5L questionnaire can be calculated, of  
109 which 11111 are the best health states (perfectly healthy) and 55555 are the worst state of  
110 health. The EQ-5D-5L utility value integral system converts a patient's health status into  
111 health utility value. A Time-trade off (TTO) approach was employed to develop Chinese EQ-  
112 5D-5L utility values ranging from  $-0.391(55555)$  to  $1(11111)$ . Furthermore, the EQ-VAS  
113 indicates the patient's subjective rating of self-reported health state on the day being  
114 interviewed, with a vertical length of 20 cm, starting at 100 (the best health imaginable) and  
115 ending at 0 (the worst health imaginable) [15]. The value of the EQ-VAS was converted to 0-  
116 1 to facilitate comparison.

117

### 118 **SF-6Dv2**

119 The SF-6Dv2 serves a broader range of dimensions than the EQ-5D-5L, of which  
120 only ten items in the SF-36 have been reclassified into six items, each dimension  
121 corresponding to one item [16]. All the dimensions except pain domains (six levels) had five  
122 levels, yielding a total of 18,750 ( $= 5 \times 5 \times 5 \times 6 \times 5 \times 5 \times 5$ ) health conditions [17]. We use

123 the set of Chinese tariff values developed for SF-6Dv2 by the TTO method, which has a  
124 range of values from -0.277 (555,655) to 1 (111,111).

125

## 126 **Sampling and data collection**

127 Participants were patients with HOCM who were hospitalized at the First Affiliated  
128 Hospital of Zhengzhou University between 1 June 2021 and 31 October 2022. Patient  
129 demographic characteristics and disease-related data, including age, sex, work and marital  
130 status, educational background, body mass index (BMI), and left ventricular ejection fraction  
131 (LVEF), were completed by the patient or extracted from the inpatient electronic medical  
132 records.

133 The inclusion criteria were supposed to be in accordance with the following: 1)  
134 consistent with the diagnosis of hypertrophic obstructive cardiomyopathy, and 2) the  
135 completed scale contained no missing data. Patients were excluded if they 1) were under 18  
136 years old, 2) refused to sign the informed consent form, or 3) had other serious illnesses or  
137 psychological disorders that prevented them from understanding the contents of the  
138 questionnaire. Eligible respondents were interviewed face-to-face on the day of admission by  
139 a research assistant who underwent a 1-day uniform professional training before the study  
140 started. After filling in the questionnaire, a second research assistant verified that the  
141 questionnaire was complete and that no items were missing. Following discharge, the patient  
142 was contacted by phone three and six months later. Upon completion of the questionnaire, the  
143 patients uploaded and returned the results.

144 The study protocol was approved by the University of Zhengzhou Ethics Committee  
145 (registration number 2021-KY-0943-002), and all participants provided written informed  
146 consent before participating in the research. This study adhered to the tenets of the 1975  
147 Declaration of Helsinki (Tokyo revision, 2004).

148

## 149 **Statistics analysis**

150           The baseline demographic statistics described continuous and categorical variables  
151 using mean, standard deviation, and frequency, respectively. Overall quality of life (QOL)  
152 indices were calculated and compared for the SF-6Dv2 and EQ-5D-5L questionnaires at three  
153 time points: on the day of admission and three and six months after discharge. A histogram  
154 represented the distributions of the two instruments. Normality tests were conducted using  
155 the skewness and kurtosis values. Because of the highly skewed distribution of the index  
156 scores, the Wilcoxon signed-rank test for differences between the index scores of the two  
157 measurements was used. In contrast, the Kruskal–Wallis test was used for comparisons  
158 between the index scores of the participants’ characteristic groups. One-way ANOVA was  
159 applied to measure changes in New York Heart Association (NYHA) cardiac function classes  
160 during follow-up. Ceiling and floor effects were measured by computing the percentage of  
161 respondents who received the highest or lowest scores in each field. The minimally important  
162 difference (MID) is often applied to explain patient-approved minimum clinical effectiveness  
163 questionnaire score changes reflecting HRQoL. The treatment is clinically significant when  
164 the score change reaches the MID threshold. In a previous study, the average MID values of  
165 the SF-6Dv2 and EQ-5D-5L were 0.041 and 0.074, respectively [18]. Intraclass correlation  
166 coefficients (ICCs) were calculated for the SF-6Dv2 and EQ-5D-5L instruments to assess  
167 agreement, which was reported as a two-way random and absolute agreement with a single  
168 metric model: ICC lies within 0.5-0.75 for moderate, 0.75-0.9 for good and more than 0.9 for  
169 excellent. Bland–Altman plots were used to explore the degree of consistency between the  
170 two utility scores [19]. Convergent validity is the degree to which the results correlate when  
171 different measures are utilized to measure similar characteristics, such as anxiety/depression  
172 on the EQ-5D-5L and mental health on the SF-6Dv2. Convergent validity was evaluated by

173 calculating Spearman's correlation ( $\rho$ ) coefficient between the domains of the two  
174 instruments. The strength of the Spearman correlation was rated as weak for less than 0.3,  
175 strong for more than 0.5, and moderate for in-between [20]. Known-group validity refers to  
176 the ability of two instruments to distinguish between each respondent's characteristic group  
177 by calculating the average utility value for each measure and comparing them [21]. We  
178 examined how well SF-6Dv2 and EQ-5D-5L detected differences in the indices of external  
179 health based on the relative efficiency (RE) statistic. The RE is defined as the ratio of the  
180 square of the t-statistic of the comparison tool to the reference tool [22]. A value  $> 1.0$   
181 represents, when determining differences in health-related external indicators, EQ-5D-5L  
182 performs better than SF-6Dv2, while a value  $< 1.0$  illustrates that the EQ-5D-5L performs  
183 less efficiently than SF-6Dv2.

184 Statistical analyses were performed using the SPSS, IBM Statistics software, version  
185 22.0. In all statistical tests, p-values less than 0.01 were assumed to be statistically  
186 significant.

187

## 188 **Results**

### 189 **Characteristics of the study sample**

190 Four of the 135 participants died during the follow-up period. As their questionnaires  
191 were incomplete, they were excluded from the sample. Consequently, 131 patients with  
192 HOcm were included in this study. Participants' sociodemographic and clinical  
193 characteristics at baseline are displayed in Tables 1 and 2, who were 53.4 years old, and most  
194 patients with HOcm were male, accounting for 55.7%, and 91.6% of patients were married.  
195 The mean body mass index (BMI) was 25.8 kg/m<sup>2</sup>. NYHA functional class III was present in  
196 53.4% of the patients, and the LVEF ranged from 29% to 79%, with an average of 64.4%.



197 We observed statistically significant differences in the NYHA cardiac function classification  
 198 on the day of admission and at three and six months after discharge ( $p < 0.01$ ).

199

200 **Table 1. Baseline characteristics**

| Characteristics             | Total (n=131) |
|-----------------------------|---------------|
| Age, mean (SD)              | 53.4 (12.1)   |
| BMI, mean (SD)              | 25.8 (3.2)    |
| EF%, mean (SD)              | 64.4(5.66)    |
| EQ-5D-5L utility, mean (SD) | 0.62(0.28)    |
| SF-6Dv2 utility, mean (SD)  | 0.61(0.19)    |
| EQ-VAS score, mean (SD)     | 0.62(0.18)    |

201 SD: Standard deviation BMI: Body Mass Index; EF: Ejection Fraction; EQ-5D-5L: 5-level  
 202 EuroQol 5-dimension; SF-6Dv2: Short Form Six-Dimension (version 2); EQ-VAS: EuroQol-  
 203 Visual Analog Scale (EQ-VAS)

204

205 **Table 2. Known-groups validity of SF-6Dv2 and EQ-5D-5L**

|                         | Ratio% | EQ-5D-5L |       | p     | SF-6Dv2 |       | p     | RE*  |
|-------------------------|--------|----------|-------|-------|---------|-------|-------|------|
|                         |        | Mean     | SD    |       | Mean    | SD    |       |      |
| Gender                  |        |          |       | 0.88  |         |       | 0.10  | 0.01 |
| Female                  | 44.3   | 0.623    | 0.277 |       | 0.583   | 0.206 |       |      |
| Male                    | 55.7   | 0.615    | 0.290 |       | 0.639   | 0.166 |       |      |
| Annual household income |        |          |       | <0.01 |         |       | <0.01 | 0.77 |
| <5K                     | 24.4   | 0.450    | 0.299 |       | 0.490   | 0.178 |       |      |
| 5K-1W                   | 10.7   | 0.706    | 0.251 |       | 0.569   | 0.188 |       |      |

|                    |      |       |       |       |       |      |      |
|--------------------|------|-------|-------|-------|-------|------|------|
| 1W-5W              | 25.2 | 0.674 | 0.282 | 0.652 | 0.153 |      |      |
| 5W-10W             | 19.8 | 0.661 | 0.253 | 0.679 | 0.178 |      |      |
| 10W-20W            | 9.9  | 0.752 | 0.189 | 0.716 | 0.210 |      |      |
| >20W               | 9.9  | 0.579 | 0.266 | 0.641 | 0.118 |      |      |
| Employment status  |      |       |       | 0.10  |       | <0.0 | 0.34 |
| Employed           | 32.8 | 0.690 | 0.254 | 0.694 | 0.156 |      |      |
| Retired            | 9.9  | 0.509 | 0.328 | 0.611 | 0.187 |      |      |
| Unemployed         | 57.3 | 0.596 | 0.285 | 0.569 | 0.189 |      |      |
| Education          |      |       |       | 0.98  |       | 0.11 | 0.03 |
| Primary or below   | 29.0 | 0.602 | 0.255 | 0.552 | 0.180 |      |      |
| Junior high school | 41.2 | 0.624 | 0.286 | 0.629 | 0.182 |      |      |
| Senior high school | 18.3 | 0.625 | 0.341 | 0.654 | 0.194 |      |      |
| College or above   | 11.5 | 0.627 | 0.270 | 0.654 | 0.182 |      |      |
| Marital status     |      |       |       | 0.90  |       | 0.86 | 0.76 |
| Divorced           | 1.5  | 0.763 | 0.254 | 0.554 | 0.409 |      |      |
| Married            | 91.6 | 0.619 | 0.285 | 0.619 | 0.185 |      |      |
| Unmarried          | 3.1  | 0.554 | 0.407 | 0.564 | 0.195 |      |      |
| Widow              | 3.8  | 0.605 | 0.189 | 0.552 | 0.178 |      |      |

|               |      |       |       |       |       |       |      |
|---------------|------|-------|-------|-------|-------|-------|------|
| NYHA          |      |       |       | <0.01 |       | <0.0  | 1.23 |
| functional    |      |       |       |       |       | 1     |      |
| class         |      |       |       |       |       |       |      |
| I             | 7.6  | 0.868 | 0.089 |       | 0.848 | 0.091 |      |
| II            | 22.9 | 0.784 | 0.135 |       | 0.688 | 0.186 |      |
| III           | 53.4 | 0.608 | 0.247 |       | 0.588 | 0.171 |      |
| IV            | 16   | 0.296 | 0.315 |       | 0.484 | 0.121 |      |
| Comorbidities |      |       |       | 0.87  |       | 0.72  | 0.22 |
| >2            | 51.1 | 0.623 | 0.304 |       | 0.620 | 0.185 |      |
| 0-2           | 48.9 | 0.614 | 0.264 |       | 0.608 | 0.188 |      |
| Current       |      |       |       | 0.03  |       | 0.64  | 1.39 |
| smoking       |      |       |       |       |       |       |      |
| Yes           | 17.6 | 0.722 | 0.233 |       | 0.676 | 0.165 |      |
| NO            | 82.4 | 0.596 | 0.289 |       | 0.601 | 0.189 |      |

206 \*Relative efficiency value of the F-statistics of one-way ANOVA (F-statistics EQ-5D-5L/ F-  
 207 statistics SF-6Dv2). NYHA, New York Heart Association; EQ-5D-5L, 5-level EuroQol 5-  
 208 dimension; SF-6Dv2, Short Form Six-Dimension (version 2)

209

## 210 Comparison

211 As shown in Fig 1, the scores from the baseline and follow-up measurements were not  
 212 normally distributed. The distribution of EQ-5D-5L as a starting point and follow-up was  
 213 highly left-skewed compared to SF-6Dv2. The most frequently distributed combinations of  
 214 SF-6Dv2 and EQ-5D-5L at baseline were 421111 and 11121. The mean utility scores of SF-  
 215 6Dv2 and EQ-5D-5L at baseline were 0.61 and 0.62, respectively. The minimum and  
 216 maximum values generated from the EQ-5D-5L were -0.182 and 1.0, respectively, while the

217 SF-6Dv2 measured  $-0.277$  and  $0.962$  at its minimum and maximum, respectively. In EQ-5D-  
218 5L, a low ceiling effect of 3 (2.3%) was observed. The EQ-VAS measured two (1.5%)  
219 participants in optimum health. No instruments produced a floor effect. Over a 3-month  
220 follow-up, the mean utility of EQ-5D-5L and SF-6Dv2 was  $0.849$  (range:  $-0.391$  to  $1.0$ ) and  
221  $0.769$  (range:  $-0.277$  to  $1.0$ ), respectively ( $p = 0.000$ ). The floor and ceiling effects of EQ-  
222 5D-5L were 2 (1.5%) and 36 (27.5%), respectively, while those of SF-6Dv2 were 2 (1.5%)  
223 and 9 (6.9%), respectively. According to the EQ-VAS score, eleven individuals (8.4 %)   
224 obtained the best possible health. The 6-month follow-up revealed the following: the mean  
225 utility values of EQ-5D-5L and SF-6Dv2 were  $0.797$  and  $0.736$  ( $p = 0.000$ ), respectively. The  
226 range of values of the two measurements was the same as for the follow-up in March. The  
227 floor and ceiling effects of EQ-5D-5L were 1 (0.8%) and 35 (26.7%), respectively, whereas  
228 those of SF-6Dv2 were 1 (0.8%) and 8 (6.1%), respectively; and 14 (10.7%) people achieved  
229 the highest EQ-VAS scores.

230

231 **Fig 1 Distribution of EQ-5D-5L and SF-6Dv2.** (A) Distribution of EQ-5D-5L at baseline;  
232 (B) Distribution of EQ-5D-5L at 3-month follow-up; (C) Distribution of EQ-5D-5L at 6-  
233 month follow-up; (D) Distribution of EQ-5D-5L at baseline; (E) Distribution of EQ-5D-5L at  
234 3-month follow-up; (F) Distribution of EQ-5D-5L at the 6-month follow-up. EQ-5D-5L: 5-  
235 level EuroQol 5-dimension. SF-6Dv2: Short-Form Six-Dimensions (Version 2)

236

## 237 **Agreement**

238 The overall agreement for the SF-6Dv2 and EQ-5D-5L in utility scores at baseline  
239 was moderate ( $ICC = 0.598$ ). The ICCs at the 3- and 6-month follow-ups indicate good  
240 agreement when comparing EQ-5D-5L and SF-6Dv2 index scores (S1 Table). The Bland–  
241 Altman plots in Fig 2a show an average difference of  $0.004$ , with a wide range of agreement

242 from  $-0.418$  to  $0.427$  between the EQ-5D-5L and SF-6Dv2 index scores. Consequently, the  
243 EQ-5D-5L measurement was 35, which was 9% less or 58% larger than the measurement by  
244 SF-6Dv2 for 95% of individuals. SF-6Dv2 and EQ-5D-5L had a large discrepancy for lower  
245 utility values, with high variation between the two instruments depending on the patient's  
246 health status. For better health, EQ-5D-5L produced higher scores, while for poorer health,  
247 SF-6Dv2 yielded higher scores. The 3-month follow-up period is shown in Fig 2b. The  
248 indicator scores for EQ-5D-5L exceeded those for SF-6Dv2, with an average difference of  
249  $0.080$  in 77.1% of observations. At the 6-month follow-up, as shown in Fig 2c, more than  
250 70.2% of the EQ-5D-5L utility scores outperformed the SF-6Dv2 utility scores, with a mean  
251 difference of  $0.061$ . The limits of the agreement ranged from  $-0.208$  to  $0.330$ .

252

253 **Fig 2. Bland–Altman plots of the difference in utility values of EQ-5D-5L and SF-6Dv2.**

254 (A) At baseline; (B) at the 3-month follow-up; and (C) at the 6-month follow-up. EQ-5D-5L:  
255 5-level EuroQol 5-dimension. SF-6Dv2: Short Form Six-Dimension (version 2)

256

257 A mean difference at the baseline of  $0.082$  was found between SF-6Dv2 and EQ-5D-  
258 5L, which is lower than the recommended MID of  $0.041$  for SF-6D and  $0.074$  for EQ-5D. Fig  
259 2c shows a mean difference of  $0.080$  between SF-6Dv2 and EQ-5D-5L, similar to the MID of  
260 EQ-5D but greater than the MID of SF-6D. The result of SF-6Dv2 versus EQ-5D-5L was  
261  $0.061$ , which was lower than the MID of EQ-5D; however, it was greater than the MID of  
262 SF-6D. It is possible that these instruments cannot be interchanged because of their clinical  
263 significance.

264

265 **Convergent validity**

266 The correlations between the SF-6Dv2 and EQ-5D-5L dimensions based on the self-  
 267 reported health of the patients are presented in Table 3. Except for the dimension of self-care  
 268 (EQ-5D-5L), most correlations between SF-6Dv2 and EQ-5D-5L at baseline were moderate  
 269 to weak. Indeed, the highest correlation at baseline and 3-month follow-up between the  
 270 Anxiety/Depression (EQ-5D-5L) and Mental Health (SF-6Dv2) dimensions was 0.86 and  
 271 0.85, followed closely by the Role Limitation (SF-6Dv2) and Usual Activities (EQ-5D-5L)  
 272 dimensions. Stronger correlations were observed at the 6-month follow-up, at which point  
 273 convergent validity between similar dimensions was evident: Self-Care and Physical  
 274 Function (0.41) and Self-Care and Role Limitation (0.41). The correlation for each dimension  
 275 tended to be moderate to strong. Overall, the SF-6Dv2 and EQ-5D-5L utilities were highly  
 276 correlated at baseline ( $\rho = 0.709$ ), 3-month follow-up ( $\rho = 0.772$ ), and 6-month follow-up  
 277 ( $\rho = 0.792$ ).

278

279 **Table 3. Spearman correlations among the EQ-5D-5L and SF-6Dv2 domains**

| EQ-5D-5L             | SF-6Dv2              |                    |                    |        |                  |          |
|----------------------|----------------------|--------------------|--------------------|--------|------------------|----------|
|                      | Physical<br>function | Role<br>limitation | Social<br>function | Pain   | Mental<br>health | Vitality |
| At baseline          |                      |                    |                    |        |                  |          |
| Mobility             | 0.53**               | 0.52**             | 0.49**             | -0.04  | 0.25**           | 0.29**   |
| Self-care            | 0.19*                | 0.19*              | 0.24**             | 0.10   | -0.01            | 0.12     |
| Usual activities     | 0.66**               | 0.71**             | 0.57**             | 0.04   | 0.40**           | 0.45**   |
| Pain/discomfort      | 0.45**               | 0.44**             | 0.32**             | 0.22*  | 0.32**           | 0.38**   |
| Anxiety/Depressed    | 0.34**               | 0.35**             | 0.25**             | 0.28** | 0.86**           | 0.45**   |
| At 3-month follow-up |                      |                    |                    |        |                  |          |
| Mobility             | 0.58**               | 0.57**             | 0.60**             | 0.16   | 0.29**           | 0.30**   |

|                      |        |        |        |        |        |        |
|----------------------|--------|--------|--------|--------|--------|--------|
| Self-care            | 0.32** | 0.29** | 0.37** | 0.37** | 0.32** | 0.26** |
| Usual activities     | 0.59** | 0.60** | 0.52** | 0.18*  | 0.31** | 0.32** |
| Pain/discomfort      | 0.40** | 0.45** | 0.26** | 0.45** | 0.39** | 0.46** |
| Anxiety/Depressed    | 0.20*  | 0.34** | 0.20*  | 0.26** | 0.85** | 0.46** |
| <hr/>                |        |        |        |        |        |        |
| At 6-month follow-up |        |        |        |        |        |        |
| Mobility             | 0.63** | 0.56** | 0.49** | 0.43** | 0.24** | 0.50** |
| Self-care            | 0.41** | 0.41** | 0.49** | 0.24** | 0.28** | 0.36** |
| Usual activities     | 0.68** | 0.60** | 0.43** | 0.28** | 0.36** | 0.49** |
| Pain/discomfort      | 0.63** | 0.58** | 0.41** | 0.58** | 0.42** | 0.66** |
| Anxiety/Depressed    | 0.52** | 0.51** | 0.49** | 0.26** | 0.59** | 0.54** |

280 SD: Standard deviation RE: relative efficiency \*\*p< 0.01 (two-tailed) EQ-5D-5L: 5-level

281 EuroQol 5-dimension; SF-6Dv2: Short Form Six-Dimension (version 2)

282

## 283 External validity

284 SF-6Dv2 and EQ-5D-5L can distinguish between known group validity (Table 2). As  
 285 measured by the SF-6Dv2 and EQ-5D-5L, participants who were less educated, unmarried,  
 286 retired, or unemployed, had comorbidities  $\leq 2$ , and higher NYHA classification tended to  
 287 have lower average utility. Additionally, EQ-5D-5L was considerably more efficient  
 288 concerning NYHA functional class (RE = 1.23) and current smoking (RE = 1.39). At the  
 289 same time, SF-6Dv2 performed better concerning sex (RE = 0.01), annual household income  
 290 (RE = 0.77), employment status (RE = 0.34), education (RE = 0.03), marital status (RE =  
 291 0.76), and comorbidities (RE = 0.22).

292

## 293 Discussion

294           This study compared the changes over time between the generic health status  
295 questionnaires SF-6Dv2 and EQ-5D-5L in patients with HOCM. To the best of our  
296 knowledge, this is the first study to compare EQ-5D-5L and SF-6Dv2 instruments in patients  
297 with HOCM. A 6-month follow-up allowed us to investigate the sensitivity of the two scales  
298 to changes in health status. As reported above, SF-6Dv2 and EQ-5D-5L displayed some  
299 parallels with respect to the ability to detect trends in the changes in health utility values.  
300 However, the absolute amounts of measured utility values were not identical. The two scales  
301 had similar average utility values at baseline. However, at the subsequent follow-up visit,  
302 when the physical function was better than SF-6Dv2, EQ-5D-5L generally showed higher  
303 utility in the same patient. These results were consistent with a recent study comparing the  
304 two instruments [23,24]. A previous study comparing EQ-5D-5L and SF-6Dv2 in breast  
305 cancer patients indicated that the utility value of EQ-5D-5L exceeded that of SF-6Dv2, which  
306 also agreed with our findings [25]. The percentage change from the baseline in the EQ-5D-5L  
307 questionnaire was higher. It is reasonable to assume that EQ-5D-5L is more responsive to  
308 change than SF-6Dv2. This might be partly attributed to the different dimensions covered by  
309 the two scales and the different utility ranges corresponding to each measure. The ceiling  
310 effect of EQ-5D-5L was evident as the NYHA cardiac function class improved after  
311 discharge. Our follow-up results showed a higher ceiling effect [26]. The disease's morbidity  
312 level is thought to be a possible factor influencing the ceiling effect in EQ-5D [27].  
313 Numerous previous studies have proven the ceiling effect of EQ-5D-5L [28,29]. These results  
314 suggest that an instrument with higher ceiling effects is ineffective in differentiating  
315 relatively better health conditions. However, neither EQ-5D-5L nor SF-6Dv2 showed floor  
316 effects. As an explanation, most patients received regular treatment on the day of admission  
317 accompanied by their family members, which led to improvements in the physical  
318 impairment and mental symptoms caused by the disease. In contrast, the SF-6Dv2 involved



319 the period over the previous four weeks and presumably had a recall bias that prevented  
320 patients from accurately perceiving physical discomfort and mental impairment within the  
321 specified time of the instrument. After the patient was discharged from the hospital at the end  
322 of the intervention, due to home care and regular re-examination of chronic diseases, the  
323 assessment of the patient’s worst self-health status was further reduced. There is no  
324 consensus on a methodology for comparing the utility scores of different MAUIs. Owing to  
325 the lack of a distinct reference standard for basic preference measures assessing health  
326 outcomes, we compared the combination of indicators concerned with correlation,  
327 consistency, convergent validity, and known group validity.

328 The ICC between the utility scores of the two tools can be observed to be moderate to  
329 good, similar to previous findings [30,31]. Nevertheless, the agreement of the instruments  
330 tended to worsen in patients with a higher NYHA cardiac function classification and poorer  
331 disease, that is, patients with lower general health status. Similar findings have been found in  
332 other studies, with low consistency between the EQ-5D-5L and SF-6Dv2 in the lower health  
333 state and vice versa [32,33]. In addition, the Bland–Altman plots showed that the 95% levels  
334 of agreement for both SF-6Dv2 and EQ-5D-5L utilities were higher than the recommended  
335 threshold of minimal clinically important difference, implying that clinically significant  
336 differences existed between utilities; therefore, the specific tools could not be regarded as  
337 interchangeable. Thus, the findings may vary depending on the scale used.

338 Surprisingly, the “pain” domain at baseline was an exception ( $\rho = 0.22$ ), which is  
339 in contrast to the results of other studies that concluded that the correlation was strongest in  
340 the area of pain [34,35]. An important consideration for inconsistencies is that pain is not the  
341 most prominent symptom of HOCM. As expected, the two questionnaires correlated well in  
342 similar domains with improved health status, especially six months after discharge. Hence,  
343 when participants possessed better physical function, the construct validity was supported by

344 a high degree of convergence. In line with this, the phenomenon frequently appears in the  
345 academic literature on the topic of this study. As described below, when describing  
346 dimensions across comparable tools or representing the same concept owing to their names,  
347 there is a risk that it may lead to inaccurate conclusions [36]. When describing dimensions  
348 across instruments as similar or representing the same concept based on their names, there is  
349 a risk that it may lead to incorrect conclusions.

350 We validated the known group validity of both SF-6Dv2 and EQ-5D-5L. The RE data  
351 showed that the SF-6Dv2 had higher discriminatory efficiency than the EQ-5D-5L version  
352 for sociodemographic characteristics other than the NYHA classification and whether they  
353 are currently smoking. SF-6Dv2 displayed better construct validity than EQ-5D-5L in a  
354 similar study [9]. The reason for the greater efficiency level of SF-6Dv2 in recognizing  
355 health-related external indicators may be associated with the features of a more detailed  
356 system of description, such as physical function and role limitation dimensions [37].  
357 However, further research is required to understand these underlying reasons better.

358 This study fills a data gap in measuring utility values in Chinese patients with HOCM  
359 using EQ-5D-5L and SF-6Dv2. Its main advantage is the absence of missing data due to  
360 thorough follow-up, which makes the results realistic and reliable. Another advantage of this  
361 study is that the EQ-5D-5L and SF-6Dv2 value sets were calculated using the Chinese tariff,  
362 which can precisely describe the characteristics of Chinese people. These results can be used  
363 for future cost-utility and value analyses. The first limitation of this study was the limited  
364 sample size and the single-center design. However, it should be considered that hypertrophic  
365 obstructive cardiomyopathy is rare and has a relatively low prevalence. Thus, caution should  
366 be exercised when making straightforward generalizations and extrapolating the results.  
367 Moreover, the questionnaire was completed at baseline using face-to-face interviews and self-  
368 reports at follow-up, which may have affected the final validity to a certain degree. Finally,

369 considering that only a few health-related external indicators were examined, a more  
370 comprehensive assessment of the content of the health survey should be conducted in the  
371 future.

372

## 373 **Conclusions**

374 The data from Chinese patients with HOCM suggest that the different results obtained  
375 for SF-6Dv2 and EQ-5D-5L in the context of CUA were different. Researchers should decide  
376 to compare instruments with one another depending on the severity of the problems typically  
377 encountered in each area of the disease under study. Notably, considering the distribution  
378 advantage, ceiling effect, and discriminant validity, the SF-6Dv2 is appropriate for evaluating  
379 patients with HOCM.

380

## 381 **Acknowledgements**

382 The authors sincerely thank all the inpatients who participated in the questionnaire,  
383 the assistants who helped us with the questionnaire, and the people who helped us with the  
384 mapping: Chongwen Gui (Henan University of Technology), Bowen Xie (Johnson &  
385 Johnson), and Jing Liu (Novartis).

386

## 387 **References**

- 388 1. Ommen SR, Mital S, Burke MA, Day SM, Deswal A, Elliott P, et al. 2020 AHA/ACC  
389 guideline for the diagnosis and treatment of patients with hypertrophic  
390 cardiomyopathy[J/OL]. *J Am Coll Cardiol*. 2020;76:e159-240.  
391 DOI:10.1016/j.jacc.2020.08.045.

- 392 2. Heitner SB, Jacoby D, Lester SJ, Owens A, Wang A, Zhang D, et al. Mavacamten  
393 treatment for obstructive hypertrophic cardiomyopathy: A clinical trial. *Ann Intern*  
394 *Med.* 2019;170:741–8. DOI:10.7326/M18-3016.
- 395 3. Bai Y, Zheng JP, Lu F, Zhang XL, Sun CP, Guo WH, et al. Prevalence, incidence and  
396 mortality of hypertrophic cardiomyopathy based on a population cohort of 21.9  
397 million in China. *Sci Rep.* 2022;12:18799. DOI:10.1038/s41598-022-20042-9.
- 398 4. Maron BJ, Desai MY, Nishimura RA, Spirito P, Rakowski H, Towbin JA, et al.  
399 Management of Hypertrophic Cardiomyopathy: JACC State-of-the-Art Review. *J Am*  
400 *Coll Cardiol.* 2022;79(4):390-414. doi: 10.1016/j.jacc.2021.11.021.
- 401 5. Makavos G, Kairis C, Tselegkidi ME, Karamitsos T, Rigopoulos AG, Noutsias M, et  
402 al. Hypertrophic cardiomyopathy: An updated review on diagnosis, prognosis, and  
403 treatment. *Heart Fail Rev.* 2019;24:439-59. DOI:10.1007/s10741-019-09775-4.
- 404 6. Xie J, Wang Y, Xu Y, Fine JT, Lam J, Garrison LP. Assessing health-related quality-  
405 of-life in patients with symptomatic obstructive hypertrophic cardiomyopathy: EQ-  
406 5D-based utilities in the Explorer-HCM trial. *J Med Econ.* 2022;25:51-8.  
407 DOI:10.1080/13696998.2021.2011301.
- 408 7. Schoonvelde SAC, Wiethoff I, Hiligsmann M, Evers SMAA, Michels M. Quality of  
409 life and societal costs in hypertrophic cardiomyopathy: Protocol of the AFFECT-  
410 HCM study. *Neth Heart J.* 2023 [2023-01-26].  
411 <https://link.springer.com/10.1007/s12471-022-01753-0>. DOI:10.1007/s12471-022-  
412 01753-0.
- 413 8. Murphy RP, Boyce CJ, Dolan P, Wood AM. Valuing the Q in QALYs: Does  
414 providing patients' ratings affect population values? *Health Psychol.* 2020;39:37-45.  
415 DOI:10.1037/hea0000806.

- 416 9. Abdin E, Chong SA, Seow E, Peh CX, Tan JH, Liu J, et al. A comparison of the  
417 reliability and validity of SF-6D, EQ-5D and HUI3 utility measures in patients with  
418 schizophrenia and patients with depression in Singapore. *Psychiatry Res.*  
419 2019;274:400-8. DOI:10.1016/j.psychres.2019.02.077.
- 420 10. Luo N, Liu G, Li M, Guan H, Jin X, Rand-Hendriksen K. Estimating an EQ-5D-5L  
421 value set for China. *Value Health.* 2017;20:662-9. DOI:10.1016/j.jval.2016.11.016.
- 422 11. Wu J, Xie S, He X, Chen G, Bai G, Feng D, et al. Valuation of SF-6Dv2 health states  
423 in China using time trade-off and discrete-choice experiment with a duration  
424 dimension. *Pharmacoeconomics.* 2021;39:521-35. DOI:10.1007/s40273-020-00997-1.
- 425 12. Franco KFM, Cabral CMN, Salvador EMES, Miyamoto GC. Comparison between  
426 different health state utility instruments in patients with fibromyalgia. *Braz J Phys*  
427 *Ther.* 2021;25:573-82. DOI:10.1016/j.bjpt.2021.02.006.
- 428 13. Stolz M, Albus C, Beutel ME, Deter HC, Fritzsche K, Herrmann-Lingen C, et al.  
429 Assessment of health-related quality of life in individuals with depressive symptoms:  
430 Validity and responsiveness of the EQ-5D-3L and the SF-6D. *Eur J Health Econ.*  
431 2022 [2022-11-22]. <https://link.springer.com/10.1007/s10198-022-01543-w>.  
432 DOI:10.1007/s10198-022-01543-w.
- 433 14. Herdman M, Gudex C, Lloyd A, Janssen M, Kind P, Parkin D, et al. Development  
434 and preliminary testing of the new five-level version of EQ-5D (EQ-5D-5L). *Qual*  
435 *Life Res.* 2011;20:1727-36. DOI:10.1007/s11136-011-9903-x.
- 436 15. Devlin N, Parkin D, Janssen B. *Methods for analysing and reporting EQ-5D*  
437 *data[M/OL]. Cham: Springer International Publishing; 2020 [2022-11-16].*  
438 <http://link.springer.com/10.1007/978-3-030-47622-9>. DOI:10.1007/978-3-030-47622-  
439 9.

- 440 16. Poder TG, Fauteux V, He J, Brazier JE. Consistency Between Three Different Ways  
441 of Administering the Short Form 6 Dimension version 2. *Value Health*. 2019;22:837-  
442 42. DOI:10.1016/j.jval.2018.12.012.
- 443 17. Brazier JE, Mulhern BJ, Bjorner JB, Gandek B, Rowen D, Alonso J, et al. Developing  
444 a New Version of the SF-6D Health State Classification System From the SF-36v2:  
445 SF-6Dv2. *Med Care New Version: SF-6Dv2*. 2020;58:557-65.  
446 DOI:10.1097/MLR.0000000000001325.
- 447 18. Walters SJ, Brazier JE. Comparison of the minimally important difference for two  
448 health state utility measures: EQ-5D and SF-6D. *Qual Life Res*. 2005;14:1523-32.  
449 DOI:10.1007/s11136-004-7713-0.
- 450 19. Giavarina D. Understanding bland Altman analysis. *Biochem Med*. 2015;25:141-51.  
451 DOI:10.11613/BM.2015.015.
- 452 20. Hazra A, Gogtay N. Biostatistics series module 6: Correlation and linear regression.  
453 *Indian J Dermatol*. 2016;61:593–601. DOI:10.4103/0019-5154.193662.
- 454 21. Heslin M, Chua KC, Trevillion K, Nath S, Howard LM, Byford S. Psychometric  
455 properties of the five-level EuroQoL-5 dimension and Short Form-6 dimension  
456 measures of health-related quality of life in a population of pregnant women with  
457 depression. *BJPsych Open*. 2019;5:e88. DOI:10.1192/bjo.2019.71.
- 458 22. Petrou S, Hockley C. An investigation into the empirical validity of the EQ-5D and  
459 SF-6D based on hypothetical preferences in a general population. *Health Econ*.  
460 2005;14:1169-89. DOI:10.1002/hec.1006.
- 461 23. Ye Z, Sun L, Wang Q. A head-to-head comparison of EQ-5D-5 L and SF-6D in  
462 Chinese patients with low back pain. *Health Qual Life Outcomes*. 2019;17:57.  
463 DOI:10.1186/s12955-019-1137-6.

- 464 24. Bjerk M, Brovold T, Davis JC, Bergland A. Evaluating a falls prevention intervention  
465 in older home care recipients: A comparison of SF-6D and EQ-5D. *Qual Life Res.*  
466 2019;28:3187-95. DOI:10.1007/s11136-019-02258-x.
- 467 25. Li S, Wang M, Liu L, Chen G. Which approach is better in eliciting health state  
468 utilities from breast cancer patients? Evidence from mainland China. *Eur J Cancer*  
469 *Care (Engl)*. 2019;28:e12965. DOI:10.1111/ecc.12965.
- 470 26. Li N, Boonen A, van den Bergh JP, van Kuijk SMJ, Wyers CE, van Oostwaard M, et  
471 al. A head-to-head comparison of EQ-5D-5L and SF-6D in Dutch patients with  
472 fractures visiting a Fracture Liaison Service. *J Med Econ*. 2022;25:829-39.  
473 DOI:10.1080/13696998.2022.2087409.
- 474 27. Bharmal M, Thomas J. Comparing the EQ-5D and the SF-6D descriptive systems to  
475 assess their ceiling effects in the US general population. *Value Health*. 2006;9:262-71.  
476 DOI:10.1111/j.1524-4733.2006.00108.x.
- 477 28. Kangwanrattanakul K. A comparison of measurement properties between UK SF-6D  
478 and English EQ-5D-5L and Thai EQ-5D-5L value sets in general Thai population.  
479 *Expert Rev Pharmacoecon Outcomes Res*. 2021;21:765-74.  
480 DOI:10.1080/14737167.2021.1829479.
- 481 29. Eneqvist T, Nemes S, Kärrholm J, Burström K, Rolfson O. How do EQ-5D-3L and  
482 EQ-5D-5L compare in a Swedish total hip replacement population? *Acta Orthop*.  
483 2020;91:272-8. DOI:10.1080/17453674.2020.1746124.
- 484 30. Xu RH, Dong D, Luo N, Wong EL, Wu Y, Yu S, et al. Evaluating the psychometric  
485 properties of the EQ-5D-5L and SF-6D among patients with haemophilia. *Eur J*  
486 *Health Econ*. 2021;22:547-57. DOI:10.1007/s10198-021-01273-5.
- 487 31. Kularatna S, Senanayake S, Gunawardena N, Graves N. Comparison of the EQ-5D 3L  
488 and the SF-6D (SF-36) contemporaneous utility scores in patients with chronic kidney

- 489 disease in Sri Lanka: A cross-sectional survey. *BMJ Open*. 2019;9:e024854.  
490 DOI:10.1136/bmjopen-2018-024854.
- 491 32. Sun CY, Liu Y, Zhou LR, Wang MS, Zhao XM, Huang WD, et al. Comparison of  
492 EuroQol-5D-3L and short Form-6D utility scores in family caregivers of colorectal  
493 cancer patients: A cross-sectional survey in China. *Front Public Health*.  
494 2021;9:742332. DOI:10.3389/fpubh.2021.742332.
- 495 33. Kontodimopoulos N, Stamatopoulou E, Gazi S, Moschou D, Krikelis M, Talias MA.  
496 A comparison of EQ-5D-3L, EQ-5D-5L, and SF-6D utilities of patients with  
497 musculoskeletal disorders of different severity: A health-related quality of life  
498 approach. *J Clin Med*. 2022;11:4097. DOI:10.3390/jcm11144097.
- 499 34. Selva-Sevilla C, Ferrara P, Gerónimo-Pardo M. Interchangeability of the EQ-5D and  
500 the SF-6D, and comparison of their psychometric properties in a spinal postoperative  
501 Spanish population. *Eur J Health Econ*. 2020;21:649-62. DOI:10.1007/s10198-020-  
502 01161-4.
- 503 35. Thuppal S, Markwell S, Crabtree T, Hazelrigg S. Comparison between the EQ-5D-3L  
504 and the SF-6D quality of life (QOL) questionnaires in patients with chronic  
505 obstructive pulmonary disease (COPD) undergoing lung volume reduction surgery  
506 (LVRS). *Qual Life Res*. 2019;28:1885-92. DOI:10.1007/s11136-019-02123-x.
- 507 36. Goodwin PC, Ratcliffe J, Morris J, Morrissey MC. Using the knee-specific Hughston  
508 Clinic Questionnaire, EQ-5D and SF-6D following arthroscopic partial meniscectomy  
509 surgery: A comparison of psychometric properties. *Qual Life Res*. 2011;20:1437-46.  
510 DOI:10.1007/s11136-011-9880-0.
- 511 37. Seymour J, McNamee P, Scott A, Tinelli M. Shedding new light onto the ceiling and  
512 floor? A quantile regression approach to compare EQ-5D and SF-6D responses.  
513 *Health Econ*. 2010;19:683–96.



514

515 **Supporting information Caption**

516 **S1 Table.** The ICCs of EQ-5D-5L and SF-6Dv2 index scores

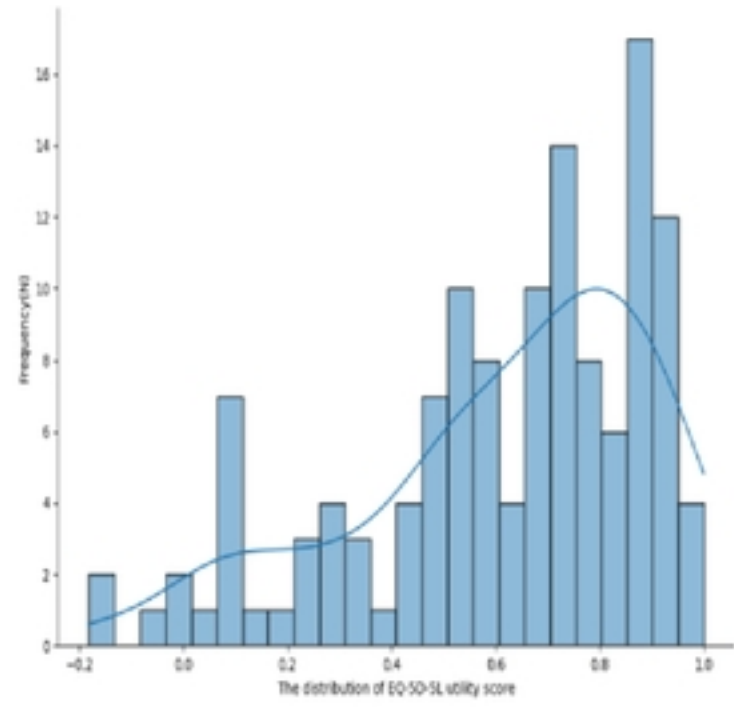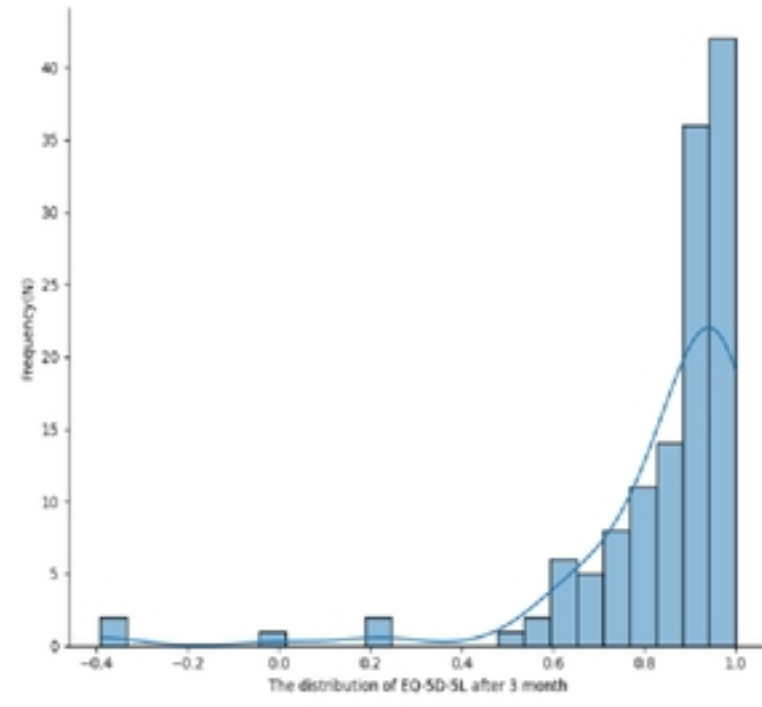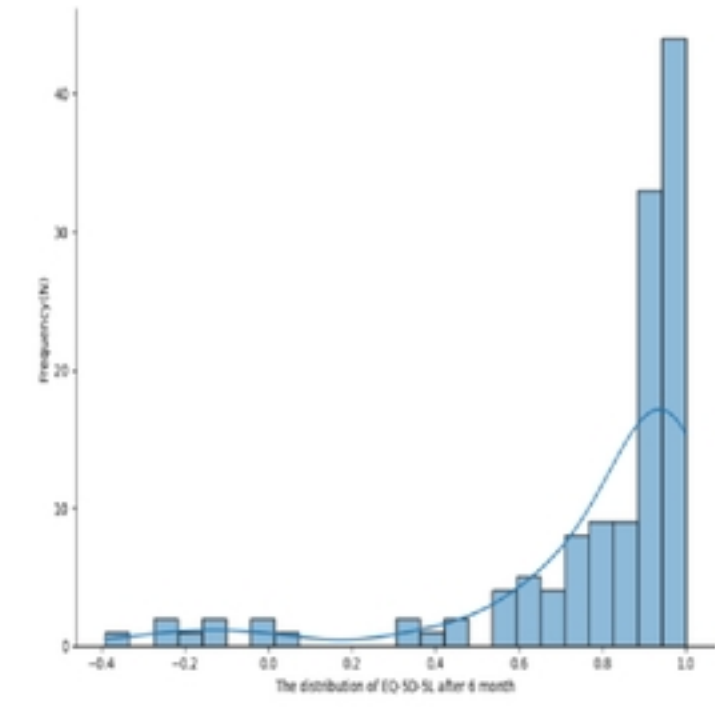

(A)

(B)

(C)

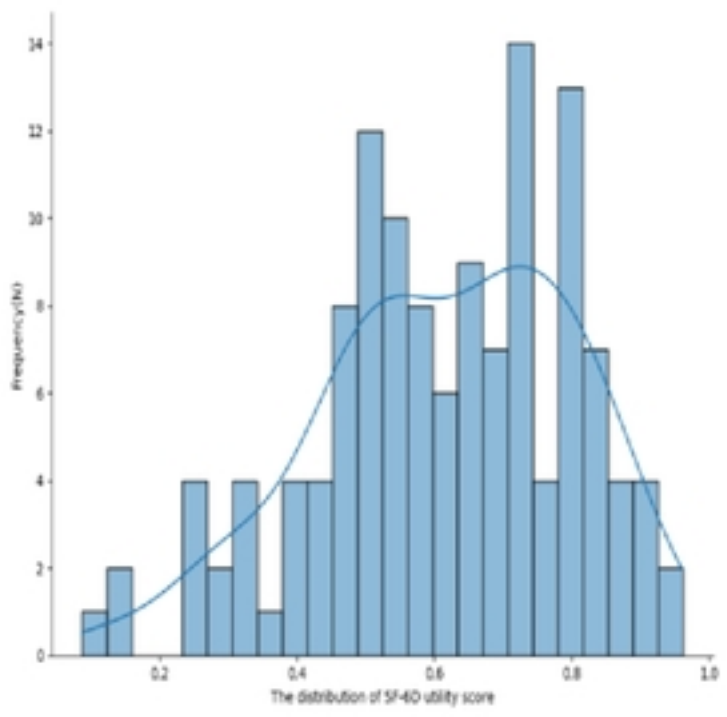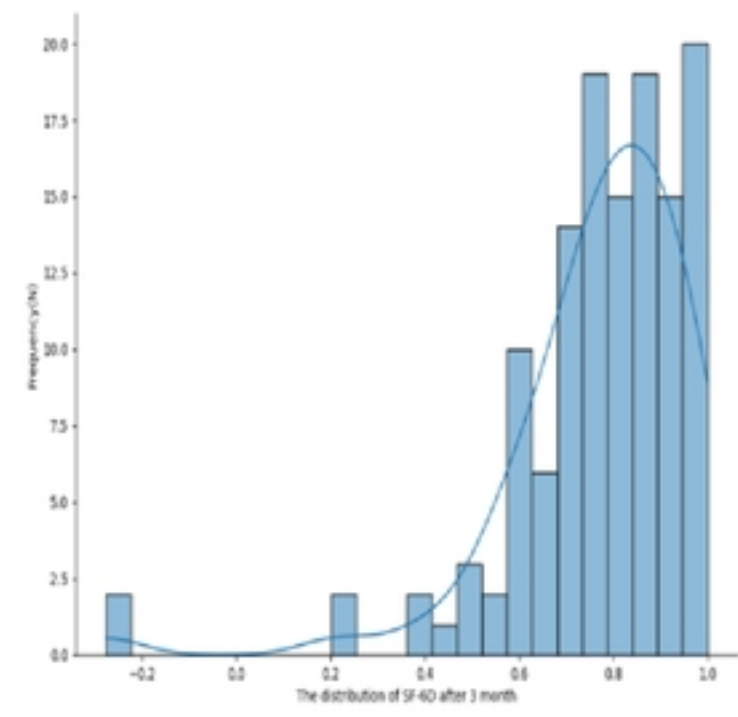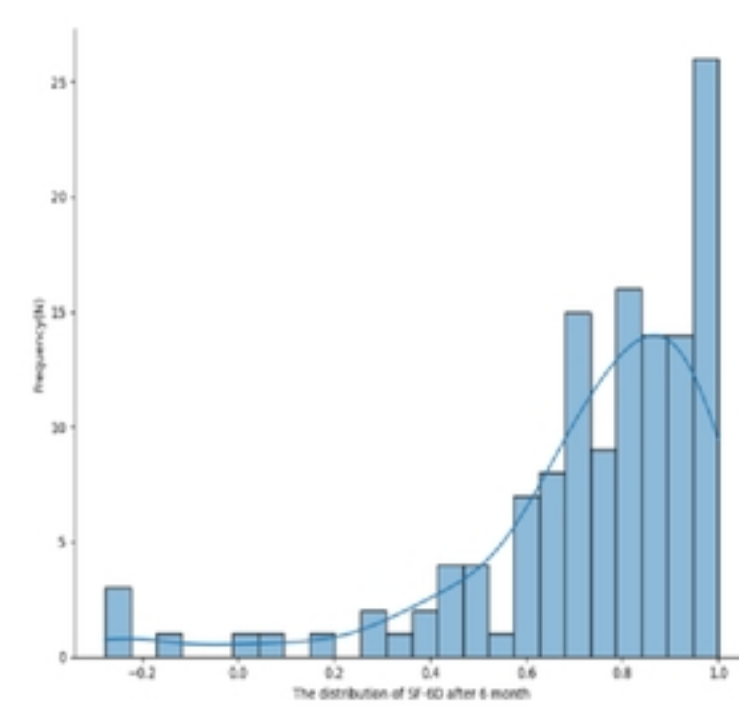

(D)

(E)

(F)

Figure 1

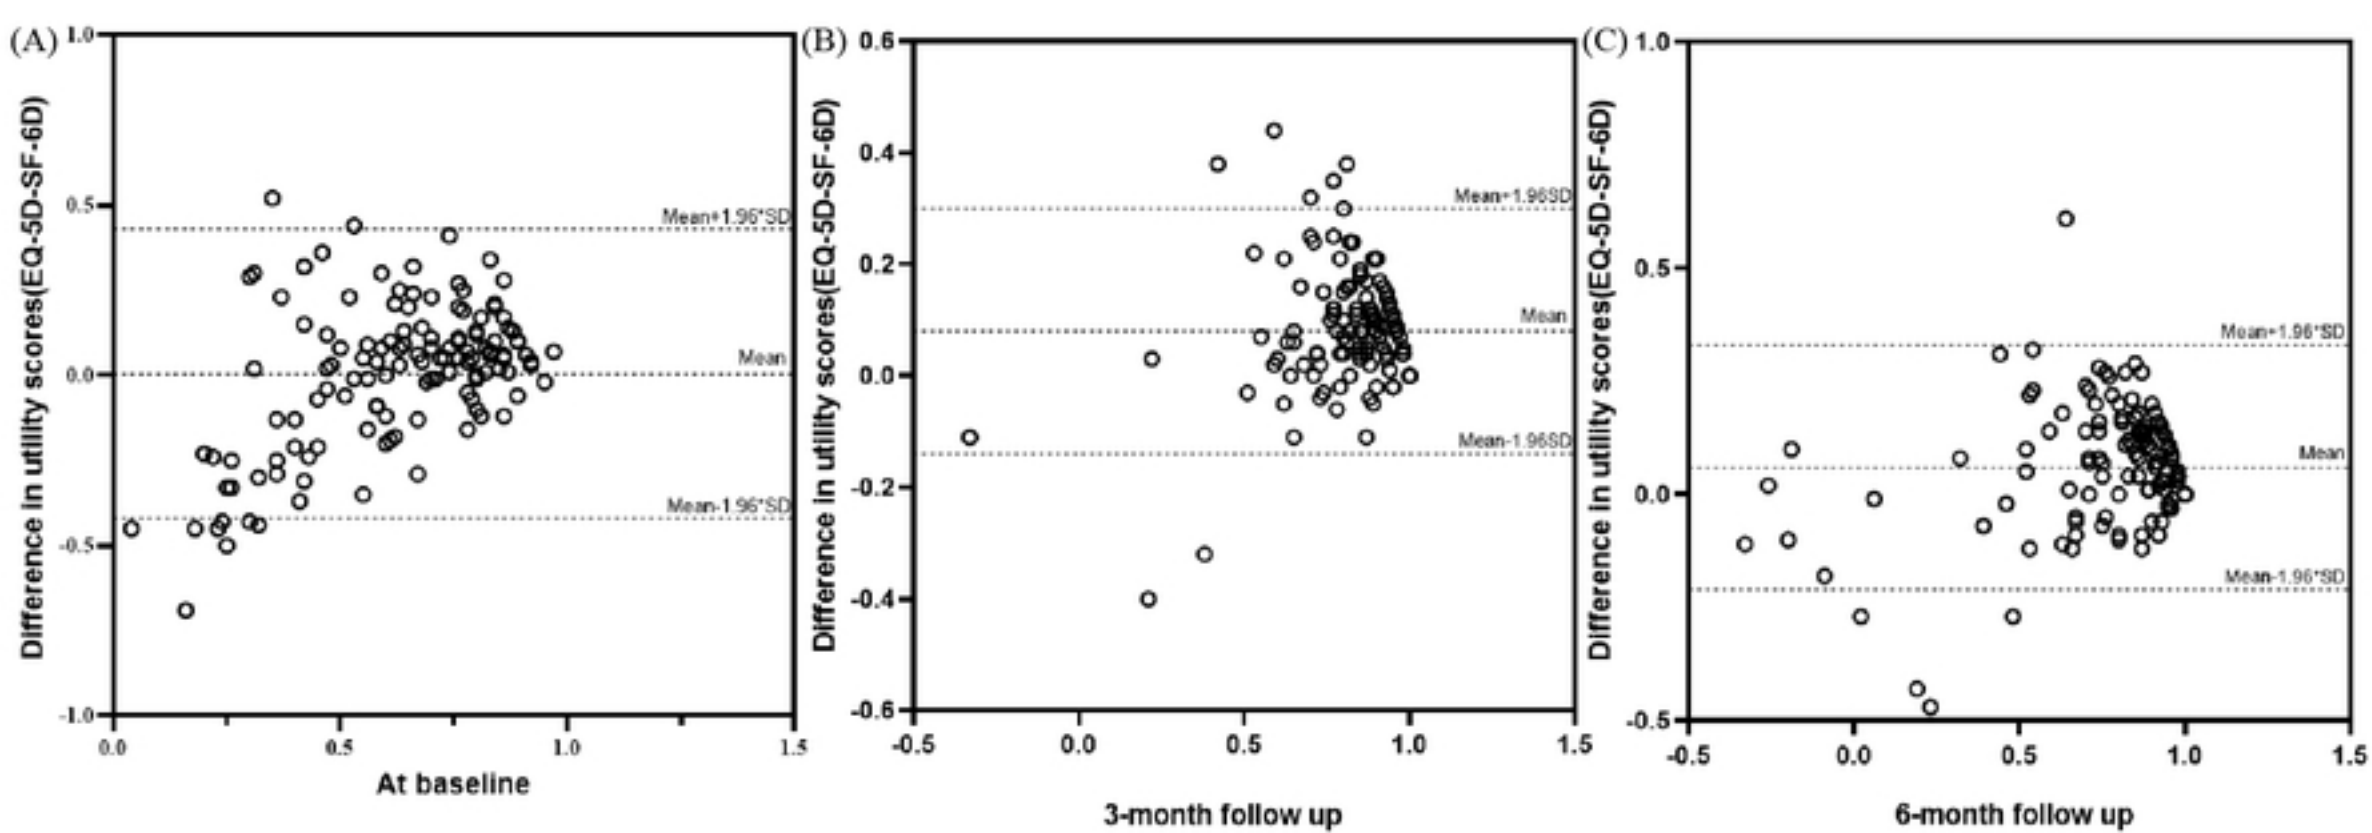

Figure 2
